# Supplementary material for: Rapid identification of melioidosis agent by an insulated isothermal PCR on a field–deployable device
Source: PeerJ journal article supplement (doi:10.7717/peerj.9238), 2020-05-27
Supplement: SUBMIT_Supplementary_S1_S4.pdf [file SUBMIT_Supplementary_S1_S4.pdf]

**Table S1: Sensitivity of iiPCR**

| First Experiment | Sample | Positive Control | Negative (Water) | 140 ng | 14 ng  | 1.4 ng | 0.14 ng | 0.014 ng | 0.0014 ng |
|------------------|--------|------------------|------------------|--------|--------|--------|---------|----------|-----------|
|                  | Signal | (+)              | (-)              | (+)    | (-)    | (-)    | (-)     | (-)      | (-)       |
|                  | R1     | 1.3355           | 0.988            | 1.3423 | 1.1158 | 1.0122 | 1.0315  | 1.0048   | 1.0203    |

| Second Experiment | Sample | Positive Control | Negative (Water) | 140 ng | 14 ng  | 1.4 ng | 0.14 ng | 0.014 ng | 0.0014 ng |
|-------------------|--------|------------------|------------------|--------|--------|--------|---------|----------|-----------|
|                   | Signal | (+)              | (-)              | (+)    | (-)    | (-)    | (-)     | (-)      | (-)       |
|                   | R2     | 1.3756           | 1.0077           | 1.6521 | 1.1203 | 1.0916 | 1.0188  | 1.0466   | 1.0397    |

| Third experiment | Sample | Positive Control | Negative (Water) | 140 ng | 14 ng  | 1.4 ng | 0.14 ng | 0.014 ng | 0.0014 ng |
|------------------|--------|------------------|------------------|--------|--------|--------|---------|----------|-----------|
|                  | Signal | (+)              | (-)              | (+)    | (-)    | (-)    | (-)     | (-)      | (-)       |
|                  | R3     | 1.6301           | 1.0508           | 1.7285 | 1.1616 | 1.0639 | 1.0261  | 1.0507   | 1.0314    |

**Table S2: Specificity of both qPCR and iiPCR**

| Organisms                                   | qPCR         | iiPCR   |                |
|---------------------------------------------|--------------|---------|----------------|
|                                             |              | Reading | Interpretation |
| <i>Aeromonas hydrophila</i> ATCC7966        | Not detected | 1.0465  | (-)            |
| <i>Aeromonas caviae</i> ATCC15468           | Not detected | 1.1969  | (-)            |
| <i>Burkholderia cepacia</i> ATCC25416       | Not detected | 1.0736  | (-)            |
| <i>Burkholderia thailandensis</i> ATCC70038 | Not detected | 1.1346  | (-)            |
| <i>Escherichia coli</i> NCTC13476           | Not detected | 1.0354  | (-)            |
| <i>Pseudomonas putida</i> ATCC49128         | Not detected | 1.1586  | (-)            |
| <i>Pseudomonas aeruginosa</i> ATCC27853     | Not detected | 1.1827  | (-)            |
| <i>Pseudomonas fluorescens</i> ATCC13525    | Not detected | 1.0795  | (-)            |
| <i>Pseudomonas stutzeri</i> ATCC17588       | Not detected | 1.1183  | (-)            |
| <i>Klebsiella pneumoniae</i> NCTC13443      | Not detected | 1.0362  | (-)            |

**Table S3: Sensitivity of qPCR**

| Exp | DNA Concentration | Replicate 1  | Replicate 2  | Replicate 3  | Average |
|-----|-------------------|--------------|--------------|--------------|---------|
| 1   | 140 ng            | 18.62        | 18.42        | 18.39        | 18.48   |
|     | 14 ng             | 21.76        | 21.7         | 21.97        | 21.81   |
|     | 1.4 ng            | 25.72        | 25.56        | 25.45        | 25.58   |
|     | 0.14 ng           | 29.21        | 29.2         | 29.11        | 29.17   |
|     | 0.014 ng          | 32.97        | 32.92        | 32.49        | 32.79   |
|     | 0.0014 ng         | 36.56        | 36.59        | 36.01        | 36.39   |
|     | NTC               | Not detected | Not detected | Not detected | -       |
| 2   | 140 ng            | 16.8         | 17.01        | 17.02        | 16.94   |
|     | 14 ng             | 20.39        | 21.46        | 20.89        | 20.91   |
|     | 1.4 ng            | 24.93        | 24.88        | 25.02        | 24.94   |
|     | 0.14 ng           | 29.16        | 28.95        | 29.12        | 29.01   |
|     | 0.014 ng          | 33.06        | 32.93        | 32.81        | 32.93   |
|     | 0.0014 ng         | 36.85        | 36.9         | 36.67        | 36.81   |
|     | NTC               | Not detected | Not detected | Not detected | -       |
| 3   | 140 ng            | 16.53        | 16.62        | 16.65        | 16.6    |
|     | 14 ng             | 20.35        | 20.54        | 20.3         | 20.4    |
|     | 1.4 ng            | 24.69        | 24.67        | 24.62        | 24.66   |
|     | 0.14 ng           | 28.68        | 28.68        | 28.93        | 28.77   |
|     | 0.014 ng          | 32.97        | 32.42        | 32.74        | 32.71   |
|     | 0.0014 ng         | 36.17        | 36.43        | 36.95        | 36.52   |
|     | NTC               | Not detected | 36.91        | Not detected | -       |

**Table S4: Screening results using qPCR and iiPCR**

| No. | DNA Sample | DNA concentration<br>(ng/uL) | qPCR<br>Ct | POCKIT  |                |              |                |
|-----|------------|------------------------------|------------|---------|----------------|--------------|----------------|
|     |            |                              |            | Run 1   |                | Repeated run |                |
|     |            |                              |            | Reading | Interpretation | Reading      | Interpretation |
| 1   | Sample 1   | 51.43                        | 18.93      | 1.9258  | (+)            |              |                |
| 2   | Sample 2   | 99.83                        | 17.65      | 1.6649  | (+)            |              |                |
| 3   | Sample 3   | 463.12                       | 14.69      | 2.1227  | (+)            |              |                |
| 4   | Sample 4   | 12.38                        | 21.67      | 1.4625  | (+)            |              |                |
| 5   | Sample 5   | 63.29                        | 18.53      | 1.8725  | (+)            |              |                |
| 6   | Sample 6   | 528.87                       | 14.44      | 2.3061  | (+)            |              |                |
| 7   | Sample 7   | 28.15                        | 20.09      | 1.6013  | (+)            |              |                |
| 8   | Sample 8   | 77.79                        | 18.13      | 1.7079  | (+)            |              |                |
| 9   | Sample 9   | 978.93                       | 13.25      | 1.9092  | (+)            |              |                |
| 10  | Sample 10  | 257.43                       | 15.82      | 1.3542  | (+)            |              |                |
| 11  | Sample 11  | 1557.85                      | 12.36      | 1.7717  | (+)            |              |                |
| 12  | Sample 12  | 529.34                       | 14.44      | 1.7657  | (+)            |              |                |
| 13  | Sample 13  | 206.97                       | 16.24      | 1.8556  | (+)            |              |                |
| 14  | Sample 14  | 511.79                       | 14.5       | 2.0848  | (+)            |              |                |
| 15  | Sample 15  | 459.35                       | 14.71      | 1.8401  | (+)            |              |                |
| 16  | Sample 16  | 1377.57                      | 12.59      | 1.8103  | (+)            |              |                |
| 17  | Sample 17  | 345.03                       | 15.26      | 2.0142  | (+)            |              |                |
| 18  | Sample 18  | 87.35                        | 17.91      | 1.9794  | (+)            |              |                |
| 19  | Sample 19  | 191.81                       | 16.39      | 1.7607  | (+)            |              |                |
| 20  | Sample 20  | 1744.53                      | 12.14      | 2.1174  | (+)            |              |                |
| 21  | Sample 21  | 374.84                       | 15.1       | 2.3166  | (+)            |              |                |
| 22  | Sample 22  | 791.48                       | 13.66      | 1.8189  | (+)            |              |                |
| 23  | Sample 23  | 763.66                       | 13.73      | 1.7449  | (+)            |              |                |
| 24  | Sample 24  | 387.1                        | 15.04      | 2.0983  | (+)            |              |                |
| 25  | Sample 25  | 132.68                       | 17.1       | 1.8367  | (+)            |              |                |
| 26  | Sample 26  | 284.29                       | 15.63      | 1.6234  | (+)            |              |                |
| 27  | Sample 27  | 39.25                        | 20.3       | 1.676   | (+)            |              |                |
| 28  | Sample 28  | 22.84                        | 20.49      | 1.7285  | (+)            |              |                |
| 29  | Sample 29  | 5560.81                      | 9.91       | 2.2635  | (+)            |              |                |
| 30  | Sample 30  | 549.9                        | 14.36      | 1.7902  | (+)            |              |                |
| 31  | Sample 31  | 166.38                       | 16.66      | 1.7409  | (+)            |              |                |
| 32  | Sample 32  | 15.1                         | 21.29      | 1.7228  | (+)            |              |                |
| 33  | Sample 33  | 37.38                        | 19.54      | 1.8173  | (+)            |              |                |
| 34  | Sample 34  | 354.77                       | 15.21      | 1.9319  | (+)            |              |                |
| 35  | Sample 35  | 198.21                       | 16.33      | 2.1163  | (+)            |              |                |
| 36  | Sample 36  | 35.38                        | 19.65      | 1.5086  | (+)            |              |                |
| 37  | Sample 37  | 178.32                       | 16.53      | 2.1671  | (+)            |              |                |
| 38  | Sample 38  | 37.39                        | 19.54      | 1.6747  | (+)            |              |                |
| 39  | Sample 40  | 307.85                       | 15.48      | 2.1603  | (+)            |              |                |
| 40  | Sample 41  | 294.54                       | 15.57      | 2.1217  | (+)            |              |                |
| 41  | Sample 42  | 624.02                       | 14.12      | 2.3712  | (+)            |              |                |
| 42  | Sample 43  | 768.1                        | 13.72      | 2.7875  | (+)            |              |                |

| No. | DNA Sample | DNA concentration<br>(ng/uL) | qPCR<br>Ct | POCKIT  |                |              |                |
|-----|------------|------------------------------|------------|---------|----------------|--------------|----------------|
|     |            |                              |            | Run 1   |                | Repeated run |                |
|     |            |                              |            | Reading | Interpretation | Reading      | Interpretation |
| 43  | Sample 44  | 383.79                       | 15.06      | 1.904   | (+)            |              |                |
| 44  | Sample 45  | 5.72                         | 23.16      | 1.6688  | (+)            |              |                |
| 45  | Sample 46  | 980.62                       | 14.23      | 2.1653  | (+)            |              |                |
| 46  | Sample 47  | 180.53                       | 16.51      | 1.9493  | (+)            |              |                |
| 47  | Sample 48  | 95.76                        | 17.73      | 1.7781  | (+)            |              |                |
| 48  | Sample 49  | 621.35                       | 14.13      | 1.9796  | (+)            |              |                |
| 49  | Sample 50  | 241.62                       | 15.95      | 2.0542  | (+)            |              |                |
| 50  | Sample 51  | 188.54                       | 16.42      | 1.8819  | (+)            |              |                |
| 51  | Sample 52  | 139.06                       | 17.01      | 1.7213  | (+)            |              |                |
| 52  | Sample 54  | 97.21                        | 17.7       | 1.7835  | (+)            |              |                |
| 53  | Sample 55  | 537.22                       | 14.41      | 1.8797  | (+)            |              |                |
| 54  | Sample 56  | 154.34                       | 16.81      | 1.7307  | (+)            |              |                |
| 55  | Sample 57  | 2266.3                       | 11.64      | 2.2382  | (+)            |              |                |
| 56  | Sample 58  | 7.44                         | 22.65      | 1.6744  | (+)            |              |                |
| 57  | Sample 59  | 586.53                       | 14.24      | 2.0138  | (+)            |              |                |
| 58  | Sample 60  | 225.4                        | 16.08      | 2.2473  | (+)            |              |                |
| 59  | Sample 61  | 182.55                       | 16.49      | 1.7981  | (+)            |              |                |
| 60  | Sample 62  | 32.96                        | 19.78      | 1.926   | (+)            |              |                |
| 61  | Sample 63  | 38.93                        | 19.46      | 2.1981  | (+)            |              |                |
| 62  | Sample 64  | 52.9                         | 18.87      | 2.2395  | (+)            |              |                |
| 63  | Sample 65  | 83.04                        | 18         | 2.1377  | (+)            |              |                |
| 64  | Sample 68  | 57.56                        | 18.71      | 2.3825  | (+)            |              |                |
| 65  | Sample 69  | 9.55                         | 22.17      | 2.2389  | (+)            |              |                |
| 66  | Sample 70  | 30.13                        | 19.96      | 1.5696  | (+)            |              |                |
| 67  | Sample 71  | 33.18                        | 19.77      | 1.8973  | (+)            |              |                |
| 68  | Sample 72  | 33.96                        | 19.72      | 2.0959  | (+)            |              |                |
| 69  | Sample 73  | 159.45                       | 16.75      | 2.0235  | (+)            |              |                |
| 70  | Sample 74  | 30.43                        | 19.94      | 1.7799  | (+)            |              |                |
| 71  | Sample 75  | 31.41                        | 19.88      | 1.8843  | (+)            |              |                |
| 72  | Sample 76  | 21.66                        | 20.59      | 2.1206  | (+)            |              |                |
| 73  | Sample 77  | 303.37                       | 15.51      | 2.0786  | (+)            |              |                |
| 74  | Sample 78  | 10.65                        | 21.96      | 1.2464  | (?)            | 1.3259       | (+)            |
| 75  | Sample 79  | 1661.55                      | 12.23      | 2.0802  | (+)            |              |                |
| 76  | Sample 80  | 201.12                       | 16.3       | 2.4792  | (+)            |              |                |
| 77  | Sample 81  | 1141.7                       | 12.96      | 2.2852  | (+)            |              |                |
| 78  | Sample 82  | 318.03                       | 15.42      | 2.4204  | (+)            |              |                |
| 79  | Sample 83  | 796.69                       | 13.65      | 1.4271  | (+)            |              |                |
| 80  | Sample 84  | 1392.17                      | 12.57      | 1.3731  | (+)            |              |                |
| 81  | Sample 86  | 328.03                       | 15.36      | 1.397   | (+)            |              |                |
| 82  | Sample 87  | 676.7                        | 13.96      | 1.3713  | (+)            |              |                |
| 83  | Sample 88  | 704.63                       | 13.89      | 1.5942  | (+)            |              |                |
| 84  | Sample 89  | 0.0097                       | 35.44      | 1.4461  | (+)            |              |                |
| 85  | Sample 90  | 1139.22                      | 12.96      | 2.1638  | (+)            |              |                |
| 86  | Sample 91  | 10.92                        | 21.91      | 2.1512  | (+)            |              |                |

| No. | DNA Sample | DNA concentration<br>(ng/uL) | qPCR<br>Ct | POCKIT         |         |                |     |
|-----|------------|------------------------------|------------|----------------|---------|----------------|-----|
|     |            |                              |            | Run 1          |         | Repeated run   |     |
|     |            |                              | Reading    | Interpretation | Reading | Interpretation |     |
| 87  | Sample 92  | 219.09                       | 17.05      | 1.9196         | (+)     |                |     |
| 88  | Sample 93  | 2127.95                      | 12.76      | 1.9845         | (+)     |                |     |
| 89  | Sample 94  | 160.25                       | 17.64      | 1.6003         | (+)     |                |     |
| 90  | Sample 96  | 252.12                       | 16.79      | 2.2921         | (+)     |                |     |
| 91  | Sample 97  | 189.32                       | 17.33      | 2.0566         | (+)     |                |     |
| 92  | Sample 98  | 5.9                          | 23.87      | 1.3995         | (+)     |                |     |
| 93  | Sample 99  | 113.84                       | 18.29      | 1.7749         | (+)     |                |     |
| 94  | Sample 100 | 379.62                       | 16.02      | 2.0418         | (+)     |                |     |
| 95  | Sample 101 | 1165.03                      | 13.9       | 2.204          | (+)     |                |     |
| 96  | Sample 102 | 83.58                        | 18.87      | 1.9668         | (+)     |                |     |
| 97  | Sample 103 | 120.01                       | 18.19      | 2.1561         | (+)     |                |     |
| 98  | Sample 104 | 41.31                        | 20.2       | 1.6242         | (+)     |                |     |
| 99  | Sample 105 | 529.66                       | 15.39      | 2.3061         | (+)     |                |     |
| 100 | Sample 106 | 47.59                        | 19.93      | 2.1752         | (+)     |                |     |
| 101 | Sample 107 | 7.97                         | 23.3       | 1.67           | (+)     |                |     |
| 102 | Sample 108 | 10.44                        | 22.79      | 1.372          | (+)     |                |     |
| 103 | Sample 109 | 352.33                       | 16.16      | 2.3125         | (+)     |                |     |
| 104 | Sample 110 | 459.9                        | 15.65      | 1.4939         | (+)     |                |     |
| 105 | Sample 111 | 13.65                        | 22.29      | 1.3872         | (+)     |                |     |
| 106 | Sample 112 | 19.26                        | 21.64      | 1.374          | (+)     |                |     |
| 107 | Sample 114 | 12.18                        | 22.5       | 1.261          | (?)     | 1.1447         | (-) |
| 108 | Sample 115 | 10.16                        | 22.84      | 1.2716         | (?)     | 1.1841         | (-) |
| 109 | Sample 117 | 6.54                         | 23.68      | 1.395          | (+)     |                |     |
| 110 | Sample 118 | 11.31                        | 22.64      | 1.4136         | (+)     |                |     |
| 111 | Sample 119 | 2.36                         | 25.6       | 1.5318         | (+)     |                |     |
| 112 | Sample 121 | 13.12                        | 22.36      | 1.3496         | (+)     |                |     |
| 113 | Sample 122 | 20.43                        | 21.53      | 1.7278         | (+)     |                |     |
| 114 | Sample 123 | 7.05                         | 23.53      | 1.768          | (+)     |                |     |
| 115 | Sample 124 | 8.54                         | 23.17      | 1.6229         | (+)     |                |     |
| 116 | Sample 126 | 19.32                        | 21.63      | 1.3567         | (+)     |                |     |
| 117 | Sample 127 | 0.0118                       | 35.59      | 1.3645         | (+)     |                |     |
| 118 | Sample 129 | 0.0072                       | 36.54      | 1.1718         | (-)     |                |     |
| 119 | Sample 130 | 41.71                        | 20.18      | 1.6814         | (+)     |                |     |
| 120 | Sample 139 | 7.82                         | 23.34      | 1.4622         | (+)     |                |     |
| 121 | Sample 145 | 13.37                        | 22.33      | 1.2655         | (?)     | 1.8492         | (+) |
